# Supplementary material
Source: Springer Nature journal article supplement (https://www.springermedizin.de/resource/supplementary/13014_2013_894_MOESM2_ESM.pdf/9634382)

## Pre- gel injection

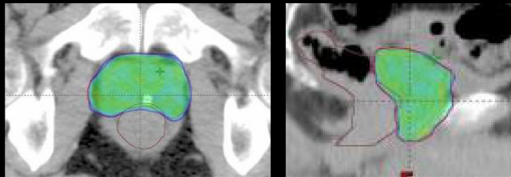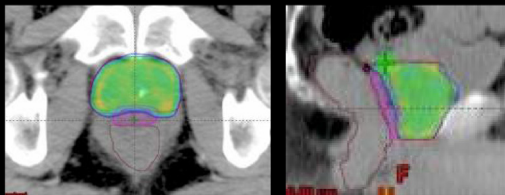

## Post- gel injection

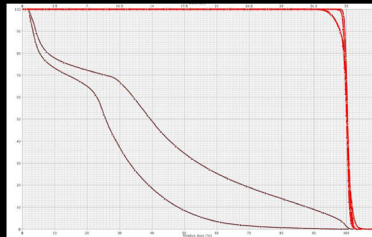

Supplement: MOESM2 [file 9634382]
